# Supplementary material
Source: PubMed Central journal article supplement (PMC10108192)
Supplement: sj-pdf-1-jcb-10.1177_0271678X221148979.pdf [file sj-pdf-1-jcb-10.1177_0271678X221148979.pdf]

## Depression, stress, and regional cerebral blood flow: Supplementary material

Joshua Chiappelli, Bhim M. Adhikari, Mark D. Kvarata, Heather A. Bruce, Eric L. Goldwaser,

Yizhou Ma, Shuo Chen, Seth Ament, Alan R. Shuldiner, Braxton D. Mitchell, Peter Kochunov,

Danny JJ Wang, L. Elliot Hong

| <b>Supplementary Table 1:</b> Previous studies on cerebral blood flow in depression. PET= positron emission tomography; ASL = arterial spin labeling; SPECT = single photon emission computed tomography; MDD = major depressive disorder; HC = healthy control; SZ = schizophrenia; FH = family history |                               |                                                      |                                                                                                                                                                                                     |                                                                               |
|----------------------------------------------------------------------------------------------------------------------------------------------------------------------------------------------------------------------------------------------------------------------------------------------------------|-------------------------------|------------------------------------------------------|-----------------------------------------------------------------------------------------------------------------------------------------------------------------------------------------------------|-------------------------------------------------------------------------------|
| <b>First author and year</b>                                                                                                                                                                                                                                                                             | <b>Imaging method</b>         | <b>Participant characteristics</b>                   | <b>Regions with decreased CBF associated with depression</b>                                                                                                                                        | <b>Regions with increased CBF associated with depression</b>                  |
| Bench 1993                                                                                                                                                                                                                                                                                               | PET                           | MDD or depressed bipolar (n=40) vs HC (n=23)         | L. Anterior cingulate; L. dorsolateral PFC; L. angular gyrus                                                                                                                                        | L. posterior cingulate                                                        |
| Colloby 2012                                                                                                                                                                                                                                                                                             | ASL                           | Older adults (>age 60) with depression (n=38) vs HC  | None                                                                                                                                                                                                | white matter                                                                  |
| Cooper 2020                                                                                                                                                                                                                                                                                              | ASL [calculated relative CBF] | Early onset (before age 30) MDD (n=164) vs HC        | Bilateral cerebellum and midbrain; R. parahippocampal gyrus; R. fusiform gyrus; R. middle temporal gyrus; Bilateral insula                                                                          | Bilateral inferior parietal lobule (including supramarginal and angular gyri) |
| Ho 2013                                                                                                                                                                                                                                                                                                  | ASL                           | Adolescent, medication-naïve depression (n=25) vs HC | Bilateral parahippocampal gyrus and insula, R. inferior frontal cortex/ dorsolateral prefrontal, R. anterior cingulate, R. middle occipital gyrus, L. inferior temporal gyrus, bilateral cerebellum | R. subcallosal cingulate, R. putamen, bilateral fusiform gyrus                |
| Ishizaki 2008                                                                                                                                                                                                                                                                                            | SPECT                         | Older adults (>age 55) with MDD (n=25) vs HC         | Anterior cingulate, bilateral ventrolateral prefrontal cortex, bilateral parieto-occipital lobes                                                                                                    | None                                                                          |
| Järnum 2011                                                                                                                                                                                                                                                                                              | ASL                           | MDD (n=23) vs HC, with 6 month follow-up             | Frontal, parietal and temporal gray matter, frontal white matter, Anterior cingulate (Only patients with non-remitting depression vs HC)                                                            | None                                                                          |
| Li 2018                                                                                                                                                                                                                                                                                                  | SPECT                         | Medication-naïve MDD (n=74) vs HC                    | Anterior cingulate, Frontal cortex, Temporal cortex                                                                                                                                                 | Occipital cortex, posterior cingulate                                         |

|                                                                       |       |                                                                                                                       |                                                                                                                                                |                                                                                                     |
|-----------------------------------------------------------------------|-------|-----------------------------------------------------------------------------------------------------------------------|------------------------------------------------------------------------------------------------------------------------------------------------|-----------------------------------------------------------------------------------------------------|
| Lui 2009                                                              | ASL   | MDD (n=61) with follow-up to determine response to treatment vs HC                                                    | L. prefrontal cortex (responders); R. prefrontal cortex and thalamus (nonresponders)                                                           | Bilateral hippocampus, R. lentiform nucleus, L. occipital cortex, paracentral (responders)          |
| Mayberg 1994                                                          | SPECT | Treatment-resistant MDD (n=13) vs HC                                                                                  | Anterior cingulate, inferior frontal cortex, superior frontal cortex, anterior temporal cortex, thalamus                                       | None                                                                                                |
| Monkul 2012                                                           | PET   | Unmedicated MDD (n=20) vs HC (n=21)                                                                                   | R. anterior cingulate; L middle frontal gyrus; L. inferior frontal gyrus                                                                       | L. and R. posterior cingulate, R. caudate, L. parahippocampal                                       |
| Ota 2014                                                              | ASL   | MDD (n=27) vs HC vs SZ                                                                                                | R. anterior cingulate, R. inferior prefrontal                                                                                                  |                                                                                                     |
| Périco 2005                                                           | SPECT | MDD (n=15) vs HC                                                                                                      | None                                                                                                                                           | L. insula, R. caudate                                                                               |
| Wang 2017                                                             | ASL   | First episode, medication-naïve MDD with family history of MDD (n=47), MDD without family history of MDD (n=36) vs HC | Bilateral prefrontal, occipital lobe, bilateral insula, R. medial temporal (w/FH only); L. prefrontal, bilateral insula, R. occipital (w/o FH) | Bilateral basal ganglia, bilateral middle temporal gyrus, L. paracentral, R. thalamus (w/FH only)   |
| Vasic 2015                                                            | ASL   | Active MDD (n=43) vs HC                                                                                               | R. cuneus, L. anterior cingulate, bilateral parahippocampal gyrus                                                                              | R. inferior parietal, R. middle temporal, bilateral middle frontal, R. superior frontal, R. caudate |
| Videbech 2001                                                         | PET   | MDD (n=42) vs HC (n=47)                                                                                               | None                                                                                                                                           | R. hippocampus; L. cerebellum                                                                       |
|                                                                       |       |                                                                                                                       |                                                                                                                                                |                                                                                                     |
| <b>Summary of replicated findings (reported in 3 or more studies)</b> |       |                                                                                                                       | Anterior cingulate cortex, prefrontal cortex, R. parahippocampal gyrus                                                                         | R. caudate                                                                                          |

Supplementary figure 1: Average cerebral blood flow (CBF) maps for control participants and participants with depression.

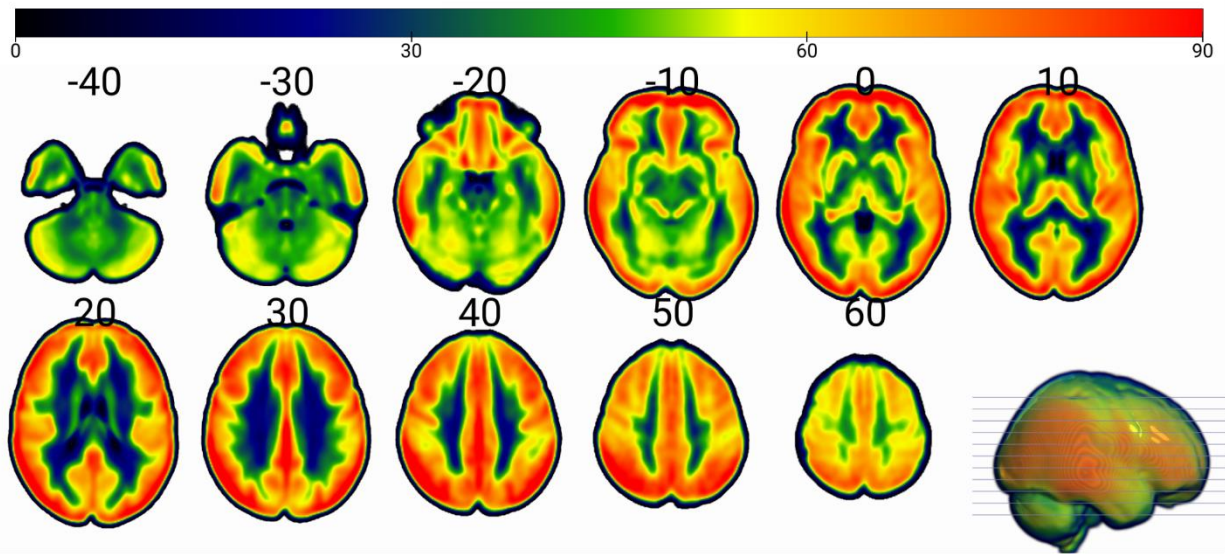

Average CBF maps for control participants

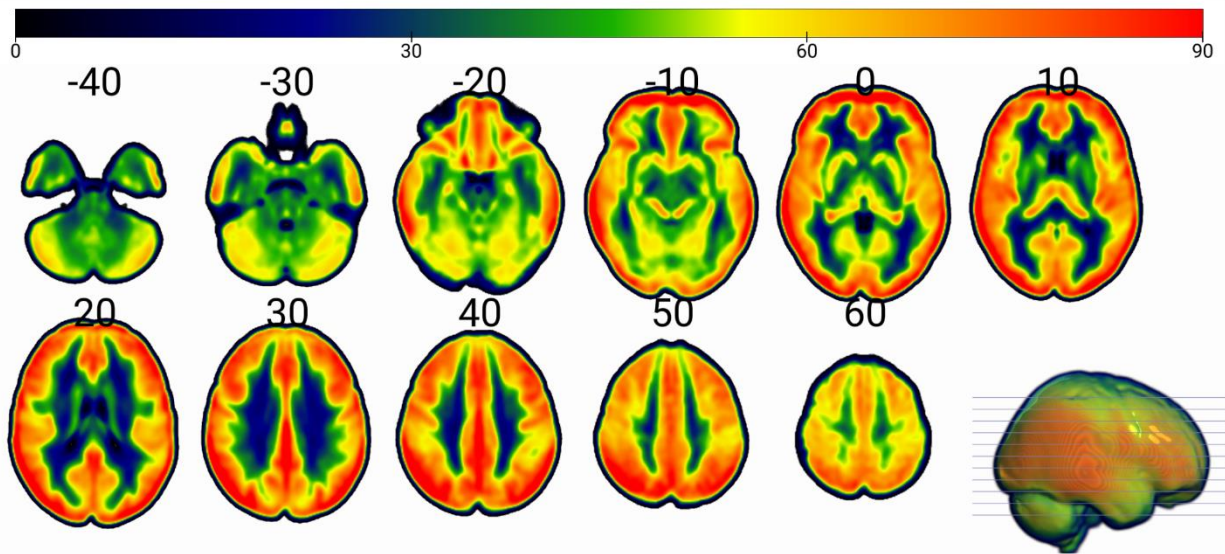

Average CBF maps for patient participants

## References

- Bench CJ, Friston KJ, Brown RG, et al. Regional cerebral blood flow in depression measured by positron emission tomography: the relationship with clinical dimensions. *Psychol Med.* 1993; 23(3):579-90.
- Colloby SJ, Firbank MJ, He J, et al. Regional cerebral blood flow in late-life depression: arterial spin labelling magnetic resonance study. *Br J Psychiatry.* 2012; 200(2):150-5.
- Cooper CM, Chin Fatt CR, Liu P, et al. Discovery and replication of cerebral blood flow differences in major depressive disorder. *Mol Psychiatry.* 2020; 25(7):1500-1510.
- Ho TC, Wu J, Shin DD, et al. Altered cerebral perfusion in executive, affective, and motor networks during adolescent depression. *J Am Acad Child Adolesc Psychiatry.* 2013; 52(10):1076-1091.e2..
- Ishizaki J, Yamamoto H, Takahashi T, et al. Changes in regional cerebral blood flow following antidepressant treatment in late-life depression. *Int J Geriatr Psychiatry.* 2008; 23(8):805-11.
- Järnum H, Eskildsen SF, Steffensen EG, et al. Longitudinal MRI study of cortical thickness, perfusion, and metabolite levels in major depressive disorder. *Acta Psychiatr Scand.* 2011; 124(6):435-46.
- Li J, Yang Y, Zhu Y, et al. Towards characterizing the regional cerebral perfusion in evaluating the severity of major depression disorder with SPECT/CT. *BMC Psychiatry.* 2018; 18(1):70.
- Lui S, Parkes LM, Huang X, et al. Depressive disorders: focally altered cerebral perfusion measured with arterial spin-labeling MR imaging. *Radiology.* 2009; 251(2):476-84.
- Mayberg HS, Lewis PJ, Regenold W, Wagner HN Jr. Paralimbic hypoperfusion in unipolar depression. *J Nucl Med.* 1994; 35(6):929-34.
- Monkul ES, Silva LA, Narayana S, et al. Abnormal resting state corticolimbic blood flow in depressed unmedicated patients with major depression: a (15)O-H(2)O PET study. *Hum Brain Mapp.* 2012; 33(2):272-9.
- Ota M, Noda T, Sato N, et al. Characteristic distributions of regional cerebral blood flow changes in major depressive disorder patients: a pseudo-continuous arterial spin labeling (pCASL) study. *J Affect Disord.* 2014; 165:59-63.
- Périco CA, Skaf CR, Yamada A, et al. Relationship between regional cerebral blood flow and separate symptom clusters of major depression: a single photon emission computed tomography study using statistical parametric mapping. *Neurosci Lett.* 2005; 384(3):265-70.

Wang S, Wang L, Jing P, et al. Aberrant patterns of brain cerebral blood flow in Chinese han first-episode drug-naïve depressive patients with and without a family history of depression. *Oncotarget*. 2017; 8(45):79906-79913.

Vasic N, Wolf ND, Grön G, et al. Baseline brain perfusion and brain structure in patients with major depression: a multimodal magnetic resonance imaging study. *J Psychiatry Neurosci*. 2015; 40(6):412-21.

Videbech P, Ravnkilde B, Pedersen AR, et al. The Danish PET/depression project: PET findings in patients with major depression. *Psychol Med*. 2001; 31(7):1147-58.
